# Supplementary material for: Aqueous Extract of Pepino (Solanum muriactum Ait) Leaves Ameliorate Lipid Accumulation and Oxidative Stress in Alcoholic Fatty Liver Disease
Source: MDPI journal article supplement (doi:10.3390/nu10070931), 2018-07-20
Supplement: s1 [file s1]

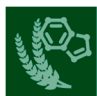**Table S1.** Composition of the aqueous extract of pepino leaf (AEPL).

| Polyphenolic compound                                        | AEPL <sup>a</sup> (%) |
|--------------------------------------------------------------|-----------------------|
| Total phenolic acid (Folin-Ciocalteu method <sup>b</sup> )   | 5.52 ± 1.27           |
| Total flavonoids (Jia method <sup>c</sup> )                  | 25.32 ± 0.48          |
| Total anthocyanins (Fuleki and Francis method <sup>d</sup> ) | 2.02 ± 1.13           |

<sup>a</sup> The AEPL was prepared as described in Materials and Methods. <sup>b-d</sup> The concentrations of total phenolic acid, flavonoid, and anthocyanin were analyzed according to the Folin-Ciocalteu method [Lakenbrink et al., 2000], Jia method [Jia et al., 1998], Fuleki and Francis method [Fuleki and Francis, 1968], respectively.

**Table S2.** Composition of the aqueous extract of pepino leaf (AEPL) vs. pepino fruits.

| Polyphenolic compounds (mg/100g dry weight)                  | AEPL <sup>a</sup> | PAE <sup>b</sup> |
|--------------------------------------------------------------|-------------------|------------------|
| Total phenolic acid (Folin-Ciocalteu method <sup>c</sup> )   | 933 ± 228         | 1217 ± 188       |
| Total flavonoids (Jia method <sup>d</sup> )                  | 4550 ± 86         | 875 ± 62         |
| Total anthocyanins (Fuleki and Francis method <sup>e</sup> ) | 360 ± 203         | 177 ± 51         |

<sup>a</sup> The AEPL was prepared as described in Materials and Methods. <sup>b</sup> The composition of aqueous extract of pepino fruit (PAE) was cited by the study of Hsu, Guo et al. <sup>c-e</sup> The concentrations of total phenolic acid, flavonoid, and anthocyanin were analyzed according to the Folin-Ciocalteu method [Lakenbrink et al., 2000], Jia method [Jia et al., 1998], Fuleki and Francis method [Fuleki and Francis, 1968], respectively.

**Table S3.** Comparison of various plant-derived polyphenols.

|                                             |                         | AEPL                                      | HSE                                                                                                                          | GTE                                                                                                                                                            |
|---------------------------------------------|-------------------------|-------------------------------------------|------------------------------------------------------------------------------------------------------------------------------|----------------------------------------------------------------------------------------------------------------------------------------------------------------|
| Full name                                   |                         | aqueous extract of pepino leaf            | aqueous extracts from <i>Hibiscus sabdariffa</i>                                                                             | Green tea extract                                                                                                                                              |
| Component                                   |                         | phenolic acids, flavonoids, anthocyanins, | phenolic acids, flavonoids, anthocyanins                                                                                     | EGCG, EGC, ECG, EC, caffeine                                                                                                                                   |
| Major compound (%)                          |                         | N/A <sup>a</sup>                          | N/A                                                                                                                          | EGCG (30–42%)                                                                                                                                                  |
| Anti-cancer and oxidative DNA damage        | Animal models           | N/A                                       | 1–2% (ICR mice)                                                                                                              | 2% (A/J mice)                                                                                                                                                  |
|                                             | Human studies           | N/A                                       | N/A                                                                                                                          | 3 g/day; 10%                                                                                                                                                   |
| Anti-lipid peroxidation and atherosclerosis | Animal models           | N/A                                       | 0.5%–1% (New Zealand White rabbits)                                                                                          | 50 mg/kg; 3% (Wistar rats)                                                                                                                                     |
|                                             | Human studies           | N/A                                       | 1 g/day                                                                                                                      | 600 mg/day                                                                                                                                                     |
| Hypoglycemic                                | Animal models           | N/A                                       | 200 mg/kg (SD rats)                                                                                                          | 500 mg/kg (SD rats)                                                                                                                                            |
|                                             | Human studies           | N/A                                       | 2 g/day                                                                                                                      | 857 mg/day                                                                                                                                                     |
| Hepatoprotection                            | Animal models           | 1–2% (C57BL/6J mice)                      | 1–5% (Wistar rats); 200–600 mg/kg (BALB/c mice)                                                                              | 2.5% (Wistar rats)                                                                                                                                             |
|                                             | Human studies           | N/A                                       | N/A                                                                                                                          | N/A                                                                                                                                                            |
| Reference                                   | In our manuscript, 2017 |                                           | Chen et al., 2005; Lin et al., 2007; Liu et al., 2006; Liu et al., 2010; Mozaffari-Khosravi et al., 2008; Pheng et al., 2011 | Higdon & Frei, 2003; Hsu et al., 2011; Kuzu et al., 2008; Lin et al., 1998; Li, Sun, Han, & Chen, 1999; Miura et al., 2000; Sano et al., 1995; Xu et al., 1992 |

N/A, Not available.
